# Supplementary figures and images for: Delayed Treatment of Diagnosed Pulmonary Tuberculosis in Taiwan
Source: Springer Nature journal article supplement (doi:10.1186/1471-2458-8-236), 2008-07-13

Year 2002

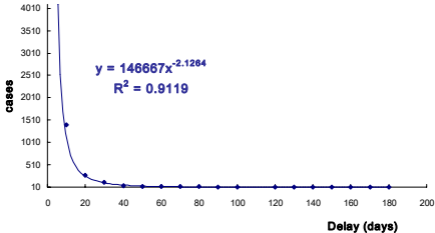

Supplement: 12889_2007_1206_MOESM1_ESM.pdf [file 12889_2007_1206_MOESM1_ESM.pdf]

Year 2003

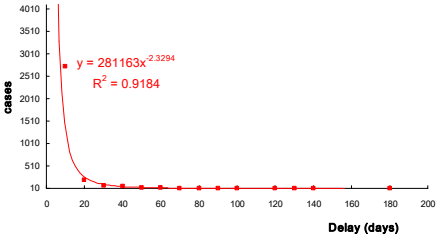

Supplement: 12889_2007_1206_MOESM2_ESM.pdf [file 12889_2007_1206_MOESM2_ESM.pdf]

Year 2004

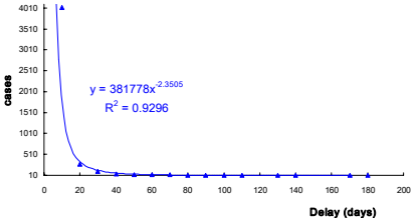

Supplement: 12889_2007_1206_MOESM3_ESM.pdf [file 12889_2007_1206_MOESM3_ESM.pdf]

Year 2005

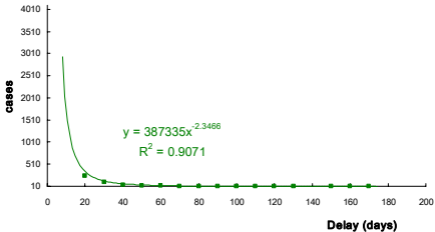

Supplement: 12889_2007_1206_MOESM4_ESM.pdf [file 12889_2007_1206_MOESM4_ESM.pdf]
